# Supplementary material for: The outcome and cost-effectiveness of nurse-led care in people with rheumatoid arthritis: a multicentre randomised controlled trial
Source: PubMed Central journal article supplement — Ann Rheum Dis. 2013 Aug 28;73(11):1975–82. doi: 10.1136/annrheumdis-2013-203403 (PMC4215359; doi:10.1136/annrheumdis-2013-203403), 2013-08-28
Supplement: annrheumdis-2013-203403-s1.pdf [file annrheumdis-2013-203403-s1.pdf]

**Figure S1: Summary of economic evaluation (NHS perspective).**

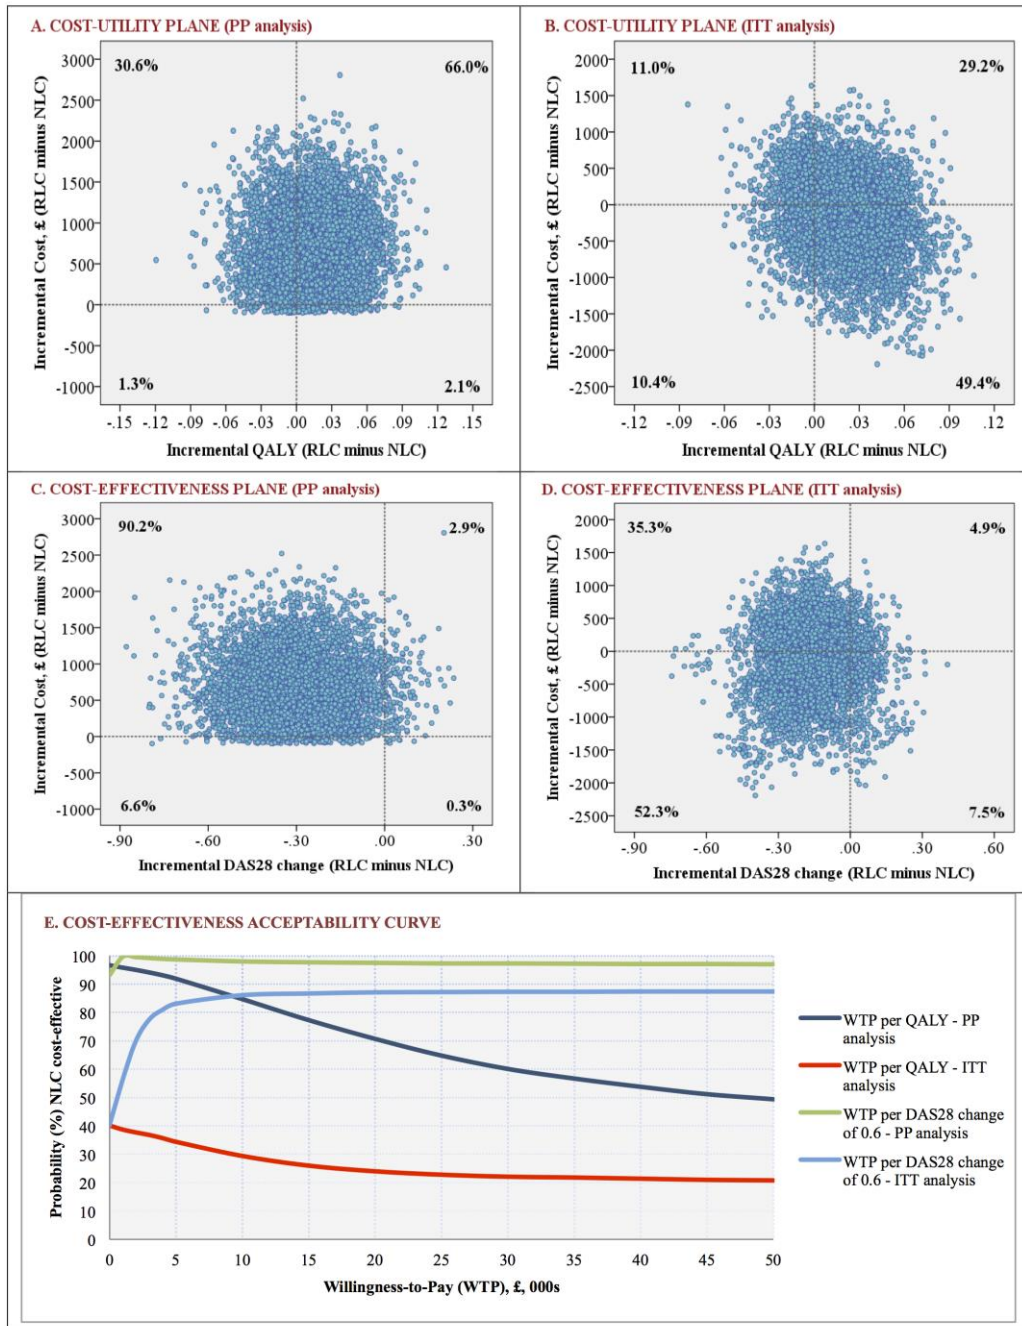

RLC = Rheumatologist-led clinic; NLC = Nurse-led clinic  
 PP = Per protocol; ITT = Intention-to-Treat  
 Incremental health care cost / QALY / DAS28 change values denote bootstrap mean difference for the RLC group minus NLC group (adjusted for age, gender, Centre, baseline DAS28 score and baseline EQ5D)  
 Percentages in the four quadrants (Graphs A-D) denote the percent of the total (5000) bootstrap cost-effect estimates that fell within each quadrant
