# Supplementary material for: The outcome and cost-effectiveness of nurse-led care in people with rheumatoid arthritis: a multicentre randomised controlled trial
Source: PubMed Central journal article supplement — Ann Rheum Dis. 2013 Aug 28;73(11):1975–82. doi: 10.1136/annrheumdis-2013-203403 (PMC4215359; doi:10.1136/annrheumdis-2013-203403), 2013-08-28
Supplement: annrheumdis-2013-203403-s2.pdf [file annrheumdis-2013-203403-s2.pdf]

**Table S1: Details of the unit costs assigned to health care resource use data and periods of work absence collected during follow-up**

| Health care resource                           | Unit Cost (£)                   | Source                                 | Details                                                                                                                                                                 |
|------------------------------------------------|---------------------------------|----------------------------------------|-------------------------------------------------------------------------------------------------------------------------------------------------------------------------|
| <b><i>Clinic sessions:</i></b>                 |                                 |                                        |                                                                                                                                                                         |
| Consultant                                     | £167 per hour                   | Curtis <sup>1</sup> ; Section 13.5     | Applied costs based on recorded clinic session times (minutes)                                                                                                          |
| Nurse specialist                               | £79 per hour                    | Curtis <sup>1</sup> ; Section 12.1     | Applied costs based on recorded clinic session times (minutes)                                                                                                          |
| <b><i>Hospital-based staff:</i></b>            |                                 |                                        |                                                                                                                                                                         |
| Medical consultant                             | £167 per hour                   | Curtis <sup>1</sup> ; Section 13.5     | Applied cost based on assumed 15-minute session time (i.e. £41.75 per session)                                                                                          |
| Surgical consultant                            | £170 per hour                   | Curtis <sup>1</sup> ; Section 13.6     | Applied cost based on assumed 15-minute session time (i.e. £42.5 per session)                                                                                           |
| Physiotherapist                                | £41 per hour                    | Curtis <sup>1</sup> ; Section 11.1     | Applied cost based on assumed 1-hour initial consultation (at £41) and 30-minute follow-up sessions (at £20.50 per session)                                             |
| Occupational therapist (and Appliance officer) | £44 per hour                    | Curtis <sup>1</sup> ; Section 11.2     | Applied cost based on assumed 1-hour session times                                                                                                                      |
| Dietician                                      | £35 per hour                    | Curtis <sup>1</sup> ; Section 11.4     | Applied cost based on assumed 30-minute session time (i.e. £17.50 per session)                                                                                          |
| Podiatrist                                     | £11 per consult                 | Curtis <sup>1</sup> ; Section 7.4      | Applied cost based on 45-minute initial consultation (at £22) and typical 20-minute follow-up sessions (£11 per session)                                                |
| A&E                                            | £93                             | Curtis <sup>1</sup> ; Section 6.1      | Applied cost based on national average for the category: not leading to admitted                                                                                        |
| <b><i>Community-based staff:</i></b>           |                                 |                                        |                                                                                                                                                                         |
| General Practitioner                           | £35 per consult                 | Curtis <sup>1</sup> ; Section 8.8b     | Applied cost based on an average 11.7-minute surgery consultation                                                                                                       |
| Social worker                                  | £91 per hour*                   | Curtis <sup>1</sup> ; Section 11.4     | Applied cost based on assumed 60-minute session time (* inclusive of 50% time face-to-face and 50% time not face-to-face)                                               |
| <b><i>Investigations:</i></b>                  |                                 |                                        |                                                                                                                                                                         |
| Plain X-ray (and Ultrasound scan)              | £55                             | DH <sup>2</sup> ; Sheet TPCT_DIAGIM_OP | Based on the figure relating to currency code RA23Z (X-rays and US scans data pooled)                                                                                   |
| DEXA scan                                      | £78                             | DH <sup>2</sup> ; Sheet TPCT_DIAGIM_OP | Based on the figure relating to currency code RA15Z                                                                                                                     |
| MRI scan                                       | £174                            | DH <sup>2</sup> ; Sheet TPCT_DIAGIM_OP | Based on the figure relating to currency code RA01Z                                                                                                                     |
| <b><i>Medication:</i></b>                      |                                 |                                        |                                                                                                                                                                         |
| Intra-articular joint injection                | £2.11                           | BNF <sup>3</sup> ; Section 10.1.2      | Based on Kenalog (triamcinolone acetonide with lidocaine, 40mg)                                                                                                         |
| Intramuscular injection                        | £11.76                          | BNF <sup>3</sup> ; Section 10.1.2      | Based on Methylprednisolone acetate (40mg)                                                                                                                              |
| Non-biologic DMARDs                            | 12-month range: £33.24 to £1245 | BNF <sup>3</sup>                       | methotrexate (15mg Weekly, £36); sulfasalazine (2g daily, £280); hydroxychloroquine (200mg daily, £33); leflunomide (20mg daily, £1245); prednisolone (20mg daily, £51) |
| Biologic DMARDs                                | 12-month cost range: £2145 to   | BNF <sup>3,4</sup>                     | infliximab (3mg/kg every 8 weeks, £2728); etanercept (50mg weekly, £2145); rituximab (2×1g infusions twice yearly, £8382);                                              |

|                                      |                                                 |                                                                      |                                                                                                                                                                                                                                                       |
|--------------------------------------|-------------------------------------------------|----------------------------------------------------------------------|-------------------------------------------------------------------------------------------------------------------------------------------------------------------------------------------------------------------------------------------------------|
|                                      | £9295                                           |                                                                      | adalimumab (40mg twice a month, £9295)                                                                                                                                                                                                                |
| Analgesics                           | 12-month<br>cost range:<br>£16.14 to<br>£102.27 | BNF <sup>3</sup>                                                     | paracetamol (8×500mg daily, £45.58);<br>cocodamol (8×500mg daily, £102.27);<br>tramadol (2×100mg daily, £16.14)                                                                                                                                       |
| NSAIDs                               | 12-month<br>cost range:<br>£34.68 to<br>£196.78 | BNF <sup>3</sup>                                                     | diclofenac (75-150mg 2-3 times daily,<br>£35.48); ibuprofen (4×200mg daily, £36.00);<br>naproxen (2×500mg daily, £89.75); etodolac<br>(600mg twice daily, £148.66); celebrex (100-<br>200mg twice daily, £196.78); meloxicam<br>(7.5mg daily, £34.68) |
| <b><i>Admissions</i></b>             |                                                 |                                                                      |                                                                                                                                                                                                                                                       |
| Day-Case                             | £425.34                                         | DH <sup>2</sup> ; Sheet TPCTDCI                                      | Based on weighted average figures for<br>currency codes HD23B/C                                                                                                                                                                                       |
| Inpatient                            | £621.58 per<br>day                              | DH <sup>2</sup> ; Sheet TPCTEI                                       | Based on weighted average figures for<br>currency codes HD23B/C                                                                                                                                                                                       |
| <b><i>Out-of-pocket expenses</i></b> | n/a                                             | As self-reported in<br>patient questionnaire                         | Inclusive of medication costs, costs of daily<br>living aids, costs of supplement foods, travel<br>expenses, and private health care costs                                                                                                            |
| <b><i>Lost work productivity</i></b> | Mean wage<br>range: £7.04<br>to £25.25          | ONS; ASHE <sup>5</sup> ; Table<br>15 (with gender<br>stratification) | Based on self-reported time off work (days).<br>Calculated as product of: days off work × (7<br>×hourly wage)                                                                                                                                         |

1. Curtis L. Unit Costs of Health and Social Care 2009. Canterbury: Personal Social Services Research Unit, University of Kent, 2009.
2. Department of Health. NHS reference costs 2009-2010. Appendix NSRC04: National Schedule of Reference Costs 2009-10 for NHS Trusts and PCTs Combined. [http://www.dh.gov.uk/en/Publicationsandstatistics/Publications/PublicationsPolicyAndGuidance/DH\\_123459](http://www.dh.gov.uk/en/Publicationsandstatistics/Publications/PublicationsPolicyAndGuidance/DH_123459)
3. British Medical Association, Royal Pharmaceutical Society of Great Britain. British National Formulary. 57th ed. (March 2009). London: BMJ Group and RPS Publishing, 2009.
4. NHS dictionary of medicines and devices. [www.dmd.nhs.uk](http://www.dmd.nhs.uk). Accessed June 2011.
5. Office for National Statistics. Annual Survey of Hours and Earnings, 2009 Results. ASHE 2009 Table 15 - Region by Occupation (4 digit SOC 2000). <http://www.ons.gov.uk/ons/publications/re-reference-tables.html?edition=tcn%3A77-210656>
