# Supplementary material for: The outcome and cost-effectiveness of nurse-led care in people with rheumatoid arthritis: a multicentre randomised controlled trial
Source: PubMed Central journal article supplement — Ann Rheum Dis. 2013 Aug 28;73(11):1975–82. doi: 10.1136/annrheumdis-2013-203403 (PMC4215359; doi:10.1136/annrheumdis-2013-203403), 2013-08-28
Supplement: annrheumdis-2013-203403-s3.pdf [file annrheumdis-2013-203403-s3.pdf]

**Table S2: Interventions and events by group**

| Type of interventions            | RLC    |                 | NLC    |                 | Risk Ratio<br>(95% CI) | Overall Effect |         |
|----------------------------------|--------|-----------------|--------|-----------------|------------------------|----------------|---------|
|                                  | Events | Total possible* | Events | Total possible* |                        | Z              | P-value |
| Change of medicines              | 86     | 320             | 53     | 345             | 0.58 (0.43, 0.79)      | 3.44           | 0.0006  |
| Change into Biologics            | 8      |                 | 3      |                 |                        |                |         |
| Dosage changes                   | 58     | 320             | 30     | 345             | 0.52 (0.34, 0.79)      | 3.08           | 0.0020  |
| Intra-articular injections       | 35     | 256             | 27     | 276             | 0.82 (0.50, 1.35)      | 0.77           | 0.4400  |
| Intra-muscular injections        | 30     | 256             | 24     | 276             | 0.73 (0.45, 1.19)      | 1.25           | 0.2100  |
| Radiographic investigations      | 62     |                 | 39     |                 |                        |                |         |
| Non-protocol bloods              | 59     | 320             | 65     | 345             | 1.02 (0.74, 1.40)      | 0.11           | 0.9100  |
| Referral to physiotherapy        | 16     | 320             | 20     | 345             | 1.21 (0.62, 2.39)      | 0.56           | 0.5800  |
| Referral to occupational therapy | 8      | 320             | 16     | 345             | 1.74 (0.76, 3.96)      | 1.31           | 0.1900  |
| Referral to podiatry             | 18     | 320             | 16     | 345             | 0.89 (0.37, 2.14)      | 0.26           | 0.8000  |
| Conferrals                       | 23     | 320             | 80     | 345             | 2.92 (1.77, 4.83)      | 4.18           | <0.0001 |
| Referral to other consultants    | 9      | 320             | 6      | 345             | 0.58 (0.11, 3.11)      | 0.64           | 0.5200  |
| Giving patient education         | 93     | 320             | 170    | 345             | 1.76 (1.15, 2.69)      | 2.62           | 0.0090  |
| Giving psychosocial support      | 56     | 320             | 202    | 345             | 3.29 (2.55, 4.24)      | 9.20           | <0.0001 |
| Visit to A&E                     | 8      |                 | 6      |                 |                        |                |         |
| Visit to the GP                  | 64     |                 | 40     |                 |                        |                |         |
| Unplanned hospital admissions    | 7      |                 | 5      |                 |                        |                |         |
| Death                            | 0      |                 | 0      |                 |                        |                |         |

RLC = Rheumatologist-led clinic; NLC = Nurse-led clinic

\*Based on patients who attended all 5 consultations
