# Supplementary material for: The outcome and cost-effectiveness of nurse-led care in people with rheumatoid arthritis: a multicentre randomised controlled trial
Source: PubMed Central journal article supplement — Ann Rheum Dis. 2013 Aug 28;73(11):1975–82. doi: 10.1136/annrheumdis-2013-203403 (PMC4215359; doi:10.1136/annrheumdis-2013-203403), 2013-08-28
Supplement: annrheumdis-2013-203403-s4.pdf [file annrheumdis-2013-203403-s4.pdf]

**Table S3: Summary estimates for secondary outcome measures over 12 months**

|                   |              | RLC          | NLC          | Difference          |          |
|-------------------|--------------|--------------|--------------|---------------------|----------|
|                   |              | Mean (SD)    | Mean (SD)    | Mean (95% CI)*      | P-value# |
| <b>ΔPain</b>      |              |              |              |                     |          |
| Week 13           | PP [74;79]** | -2.18 (26.9) | 2.61 (26.3)  | -2.82 (-10.4, 4.79) | 0.0022   |
|                   | ITT          | 0.92 (29.1)  | 2.88 (28.6)  | -1.29 (-9.24, 6.66) | 0.0102   |
| Week 26           | PP [72;78]** | -4.75 (27.2) | -0.51 (27.8) | -2.25 (-10.2, 5.66) | 0.0050   |
|                   | ITT          | -3.33 (29.4) | -1.19 (29.2) | 0.28 (-7.38, 7.93)  | 0.0240   |
| Week 39           | PP [72;79]** | -1.60 (27.9) | 3.77 (26.2)  | -3.86 (-11.4, 3.70) | 0.0008   |
|                   | ITT          | 0.12 (30.8)  | 3.93 (28.1)  | -1.88 (-9.37, 5.61) | 0.0041   |
| Week 52           | PP [73;80]** | -3.74 (27.5) | 0.61 (27.2)  | -3.27 (-10.8, 4.31) | 0.0014   |
|                   | ITT          | -2.78 (30.1) | 1.91 (29.9)  | -2.46 (-10.1, 5.16) | 0.0029   |
| Overall           | PP [68;73]** | -3.90 (23.5) | 1.94 (22.0)  | -4.76 (-10.8, 1.26) | <0.0001  |
|                   | ITT          | -1.73 (24.9) | 1.88 (23.2)  | -1.34 (-7.13, 4.45) | 0.0004   |
| <b>ΔFatigue</b>   |              |              |              |                     |          |
| Week 13           | PP [75;80]** | 2.13 (29.3)  | -1.30 (20.9) | 4.00 (-2.98, 11.0)  | 0.0963   |
|                   | ITT          | 2.86 (30.4)  | -1.88 (22.4) | 5.02 (-1.78, 11.8)  | 0.1570   |
| Week 26           | PP [73;81]** | -1.84 (27.2) | -2.70 (24.6) | 1.24 (-5.99, 8.46)  | 0.0182   |
|                   | ITT          | -1.53 (30.4) | -2.32 (26.0) | 0.71 (-6.30, 7.73)  | 0.0099   |
| Week 39           | PP [74;80]** | 5.01 (26.0)  | 0.55 (29.3)  | 4.69 (-3.05, 12.4)  | 0.1840   |
|                   | ITT          | 6.01 (30.4)  | 0.62 (30.5)  | 5.41 (-2.22, 13.0)  | 0.2454   |
| Week 52           | PP [75;80]** | 2.51 (27.0)  | -1.58 (26.5) | 3.72 (-3.77, 11.2)  | 0.1039   |
|                   | ITT          | 1.94 (29.6)  | -1.31 (27.6) | 2.36 (-4.97, 9.70)  | 0.0429   |
| Overall           | PP [73;76]** | 1.66 (23.1)  | -1.10 (21.0) | 2.67 (-3.07, 8.41)  | 0.0132   |
|                   | ITT          | 2.32 (25.5)  | -1.22 (21.3) | 3.38 (-2.01, 8.76)  | 0.0171   |
| <b>ΔStiffness</b> |              |              |              |                     |          |
| Week 13           | PP [74;78]** | -1.80 (62.4) | -4.38 (35.4) | 2.08 (-12.8, 17.0)  | 0.0042   |
|                   | ITT          | -0.02 (63.2) | -4.50 (40.3) | 1.33 (-12.8, 15.5)  | 0.0018   |

|         |              |             |              |                    |        |
|---------|--------------|-------------|--------------|--------------------|--------|
| Week 26 | PP [74;79]** | 2.05 (54.2) | -9.49 (56.1) | 6.86 (-9.22, 22.9) | 0.0380 |
|         | ITT          | 3.91 (58.8) | -10.1 (58.0) | 9.65 (-5.57, 24.9) | 0.0670 |
| Week 39 | PP [73;80]** | 9.34 (64.4) | 1.30 (57.7)  | 4.85 (-11.5, 21.2) | 0.0222 |
|         | ITT          | 12.2 (71.4) | -0.38 (63.5) | 8.28 (-7.61, 24.2) | 0.0554 |
| Week 52 | PP [72;77]** | 13.8 (64.6) | -7.16 (59.1) | 15.4 (-0.91, 31.6) | 0.3061 |
|         | ITT          | 10.9 (69.2) | -8.90 (63.3) | 16.4 (-0.38, 33.1) | 0.3822 |
| Overall | PP [71;72]** | 6.05 (53.5) | -5.08 (40.8) | 5.72 (-6.93, 18.4) | 0.0049 |
|         | ITT          | 6.76 (56.3) | -5.98 (43.2) | 8.91 (-2.66, 20.5) | 0.0113 |

#### **ΔRAQoL**

|         |              |             |              |                     |         |
|---------|--------------|-------------|--------------|---------------------|---------|
| Week 26 | PP [63;68]** | 0.83 (5.74) | -0.24 (4.79) | 0.78 (-0.99, 2.55)  | 0.0126  |
|         | ITT          | 0.99 (6.24) | 0.32 (6.02)  | 0.42 (-1.31, 2.14)  | 0.0028  |
| Week 52 | PP [63;62]** | 0.46 (6.02) | 0.40 (5.10)  | -0.28 (-2.24, 1.69) | 0.0010  |
|         | ITT          | 0.48 (6.85) | 0.81 (6.61)  | -0.70 (-2.54, 1.14) | <0.0001 |
| Overall | PP [61;61]** | 0.71 (5.56) | 0.06 (4.65)  | 0.41 (-1.38, 2.20)  | 0.0041  |
|         | ITT          | 0.74 (6.05) | 0.56 (5.75)  | -0.14 (-1.77, 1.49) | 0.0001  |

#### **ΔHAQ**

|         |              |              |             |                     |         |
|---------|--------------|--------------|-------------|---------------------|---------|
| Week 26 | PP [65;73]** | -0.06 (0.43) | 0.05 (0.47) | -0.12 (-0.27, 0.03) | <0.0001 |
|         | ITT          | -0.08 (0.50) | 0.05 (0.51) | -0.14 (-0.28, 0.00) | <0.0001 |
| Week 52 | PP [62;66]** | 0.08 (0.47)  | 0.07 (0.49) | 0.00 (-0.17, 0.16)  | 0.0003  |
|         | ITT          | 0.07 (0.58)  | 0.05 (0.58) | 0.00 (-0.17, 0.16)  | 0.0003  |
| Overall | PP [58;64]** | 0.03 (0.43)  | 0.09 (0.44) | -0.07 (-0.22, 0.09) | <0.0001 |
|         | ITT          | 0.00 (0.50)  | 0.05 (0.51) | -0.07 (-0.21, 0.07) | <0.0001 |

#### **ΔHAD-**

##### **Anxiety**

|         |              |             |              |                    |        |
|---------|--------------|-------------|--------------|--------------------|--------|
| Week 26 | PP [70;76]** | 0.70 (3.29) | -0.24 (2.59) | 0.76 (-0.12, 1.65) | 0.0587 |
|         | ITT          | 0.72 (3.32) | -0.15 (2.93) | 0.70 (-0.14, 1.54) | 0.0320 |
| Week 52 | PP [66;70]** | 0.82 (3.65) | 0.20 (2.79)  | 0.49 (-0.55, 1.53) | 0.0329 |
|         | ITT          | 1.00 (3.82) | 0.35 (3.28)  | 0.48 (-0.51, 1.47) | 0.0237 |
| Overall | PP [64;70]** | 0.72 (3.27) | -0.02 (2.43) | 0.54 (-0.36, 1.43) | 0.0179 |

|                   |              |              |              |                     |         |
|-------------------|--------------|--------------|--------------|---------------------|---------|
|                   | ITT          | 0.86 (3.23)  | 0.10 (2.81)  | 0.59 (-0.22, 1.40)  | 0.0130  |
| <b>ΔHAD-</b>      |              |              |              |                     |         |
| <b>Depression</b> |              |              |              |                     |         |
| Week 26           | PP [70;76]** | 0.13 (3.17)  | -0.11 (3.16) | 0.07 (-0.86, 1.00)  | 0.0024  |
|                   | ITT          | 0.23 (3.41)  | -0.11 (3.56) | 0.16 (-0.73, 1.05)  | 0.0028  |
| Week 52           | PP [66;70]** | 0.38 (3.22)  | 0.47 (2.55)  | -0.18 (-1.09, 0.73) | 0.0003  |
|                   | ITT          | 0.55 (3.42)  | 0.28 (3.22)  | 0.07 (-0.84, 0.98)  | 0.0018  |
| Overall           | PP [64;70]** | 0.23 (2.95)  | 0.34 (2.47)  | -0.20 (-1.00, 0.61) | <0.0001 |
|                   | ITT          | 0.39 (3.01)  | 0.09 (3.04)  | 0.12 (-0.65, 0.89)  | 0.0004  |
| <b>ΔASES</b>      |              |              |              |                     |         |
| Week 26           | PP [70;76]** | -1.69 (15.9) | 0.17 (16.3)  | 0.21 (-4.47, 4.88)  | 0.0012  |
|                   | ITT          | -2.38 (17.2) | -0.17 (16.9) | -0.38 (-4.98, 4.23) | 0.0030  |
| Week 52           | PP [63;68]** | -4.11 (14.8) | -1.16 (17.8) | -1.56 (-6.51, 3.38) | 0.0075  |
|                   | ITT          | -5.54 (17.4) | -2.10 (19.5) | -1.47 (-6.08, 3.14) | 0.0126  |
| Overall           | PP [62;68]** | -2.93 (14.3) | 0.07 (15.7)  | -0.99 (-5.33, 3.34) | 0.0042  |
|                   | ITT          | -3.96 (15.6) | -1.13 (16.5) | -0.92 (-4.96, 3.12) | 0.0019  |

RLC = Rheumatologist-led clinic; NLC = Nurse-led clinic

Δ = Change in score from baseline (baseline score minus follow up score)

PP = Per protocol; ITT = Intention-to-Treat

\* Difference in mean scores for the RLC group minus NLC group (adjusted for age, gender, Centre, baseline DAS28 score and corresponding baseline score of secondary outcome measure).

\*\* Analysis of complete-cases [number of completed responders – RLC group; NLC group].

# Non-inferiority testing (i.e. null hypothesis: standardised mean difference (mean difference/pooled baseline standard deviation) = 0.4)
