# Supplementary material for: The outcome and cost-effectiveness of nurse-led care in people with rheumatoid arthritis: a multicentre randomised controlled trial
Source: PubMed Central journal article supplement — Ann Rheum Dis. 2013 Aug 28;73(11):1975–82. doi: 10.1136/annrheumdis-2013-203403 (PMC4215359; doi:10.1136/annrheumdis-2013-203403), 2013-08-28
Supplement: annrheumdis-2013-203403-s5.pdf [file annrheumdis-2013-203403-s5.pdf]

**Table S4: Summary estimates for satisfaction scores**

|                                                                     | RLC            | NLC            | Difference |        |         | Effect size |
|---------------------------------------------------------------------|----------------|----------------|------------|--------|---------|-------------|
|                                                                     | Median (IQR)#  | Median (IQR)#  | U          | z      | P-value | r           |
| <b>Leeds Satisfaction Questionnaire - LSQ (1-5, 1=lowest score)</b> |                |                |            |        |         |             |
| <b>Week 26</b>                                                      |                |                |            |        |         |             |
| LSQ-General (70, 70)*                                               | 2.3 (2.0, 2.7) | 2.5 (2.3, 2.7) | 1967.5     | -2.096 | 0.036   | -0.17       |
| LSQ-Information (70, 70)*                                           | 3.0 (2.8, 3.1) | 3.0 (2.9, 3.1) | 2218.5     | -0.980 | 0.327   | -0.08       |
| LSQ-Empathy (70, 70)*                                               | 3.0 (2.8, 3.1) | 3.0 (2.8, 3.0) | 2311.0     | -0.588 | 0.557   | -0.05       |
| LSQ-Technical (70, 70)*                                             | 3.0 (2.9, 3.1) | 3.0 (3.0, 3.1) | 2203.5     | -1.053 | 0.293   | -0.08       |
| LSQ-Attitude (70, 70)*                                              | 3.0 (2.8, 3.0) | 3.0 (2.8, 3.2) | 2043.0     | -1.741 | 0.082   | -0.14       |
| LSQ-Access (70, 70)*                                                | 3.0 (3.0, 3.1) | 3.0 (3.0, 3.1) | 2431.5     | -0.081 | 0.936   | -0.01       |
| <b>Week 52</b>                                                      |                |                |            |        |         |             |
| LSQ-General (59, 67)*                                               | 2.7 (2.3, 2.7) | 2.3 (2.3, 2.7) | 1714.0     | -1.333 | 0.183   | -0.12       |
| LSQ-Information (59, 67)*                                           | 3.0 (2.9, 3.1) | 3.0 (2.8, 3.0) | 1770.0     | -1.034 | 0.301   | -0.09       |
| LSQ-Empathy (59, 67)*                                               | 3.0 (2.9, 3.1) | 3.0 (2.9, 3.0) | 1865.0     | -0.557 | 0.578   | -0.05       |
| LSQ-Technical (59, 67)*                                             | 3.0 (3.0, 3.3) | 3.0 (3.0, 3.1) | 1797.5     | -0.898 | 0.369   | -0.08       |
| LSQ-Attitude (59, 67)*                                              | 3.0 (2.8, 3.2) | 3.0 (2.8, 3.2) | 1800.0     | -0.888 | 0.375   | -0.08       |
| LSQ-Access (59, 67)*                                                | 3.0 (3.0, 3.1) | 3.0 (2.9, 3.1) | 1745.5     | -1.156 | 0.248   | -0.10       |

RLC = Rheumatologist-led clinic; NLC = Nurse-led clinic

# Medians of observed values (not change)

U = Mann-Whitney (U) Statistic

z = z-score

r = the effect size

\* Analysis of complete-cases [number of completed questionnaires – RLC group; NLC group].
