# Supplementary material for: The outcome and cost-effectiveness of nurse-led care in people with rheumatoid arthritis: a multicentre randomised controlled trial
Source: PubMed Central journal article supplement — Ann Rheum Dis. 2013 Aug 28;73(11):1975–82. doi: 10.1136/annrheumdis-2013-203403 (PMC4215359; doi:10.1136/annrheumdis-2013-203403), 2013-08-28
Supplement: annrheumdis-2013-203403-s6.pdf [file annrheumdis-2013-203403-s6.pdf]

**Table S5: Summary of disaggregated RA-related health resource use and costs (£) for participants fulfilling the per-protocol criteria (providing full complete-cost data).**

|                                | RLC           |                   | NLC           |                   |
|--------------------------------|---------------|-------------------|---------------|-------------------|
|                                | Mean no. (SD) | Mean cost (SD)    | Mean no. (SD) | Mean cost (SD)    |
| Clinic visits                  | 5             | £198.24 (51.44)   | 5             | £155.91 (68.71)   |
| X-Rays                         | 1.08 (1.30)   | £59.34 (71.72)    | 1.10 (1.28)   | £60.37 (70.53)    |
| Ultrasound scans               | 0.07 (0.25)   | £3.62 (13.73)     | 0.10 (0.34)   | £5.37 (18.56)     |
| Bone density scans             | 0.12 (0.33)   | £9.24 (25.37)     | 0.07 (0.31)   | £5.71 (23.83)     |
| MRIs                           | 0.04 (0.20)   | £6.87 (34.11)     | 0.02 (0.22)   | £4.24 (38.43)     |
| Joint steroid injections       | 0.84 (1.12)   | £1.78 (2.36)      | 0.56 (0.89)   | £1.18 (1.88)      |
| IM steroid injections          | 0.54 (0.81)   | £6.34 (9.49)      | 0.48 (0.85)   | £5.59 (9.99)      |
| Physiotherapist visits         | 0.70 (2.12)   | £17.26 (49.43)    | 1.06 (2.81)   | £26.50 (63.98)    |
| Occupational therapist visits  | 0.74 (3.12)   | £32.42 (137.15)   | 0.77 (1.95)   | £33.80 (85.88)    |
| Podiatrist visits              | 0.13 (0.50)   | £2.32 (8.29)      | 0.21 (0.66)   | £3.49 (10.50)     |
| Dietician visits               | 0.01 (0.12)   | £0.23 (2.01)      | 0.01 (0.11)   | £0.21 (1.93)      |
| Social worker visits           | 0.01 (0.12)   | £1.20 (10.44)     | 0.01 (0.11)   | £1.11 (10.05)     |
| Appliance officer visits       | 0.03 (0.16)   | £1.16 (7.09)      | 0.06 (0.33)   | £2.68 (14.42)     |
| Orthopaedic surgeon visits     | 0.13 (0.47)   | £5.59 (20.05)     | 0.11 (0.45)   | £4.66 (18.90)     |
| Other consultant visits        | 0.25 (0.68)   | £10.44 (28.21)    | 0.28 (0.65)   | £11.71 (27.27)    |
| GP visits                      | 0.83 (1.05)   | £29.01 (36.77)    | 0.45 (0.89)   | £15.79 (31.19)    |
| Hospital inpatient stay days   | 0.66 (2.32)   | £408.93 (1444.61) | 0.35 (1.72)   | £219.83 (1067.14) |
| No. of day-case admissions     | 0.29 (1.45)   | £123.12 (616.63)  | 0.17 (0.63)   | £72.62 (265.71)   |
| A&E visits                     | 0.11 (0.53)   | £9.79 (49.40)     | 0.07 (0.47)   | £6.80 (43.30)     |
| Cost of non-Biologic DMARDs    | -             | £171.58 (305.48)  | -             | £123.38 (266.86)  |
| Cost of Biologic DMARDs        | -             | £603.83 (1825.60) | -             | £931.10 (2376.02) |
| Cost of Analgesics             | -             | £16.20 (32.89)    | -             | £11.83 (27.28)    |
| Cost of NSAIDs                 | -             | £23.83 (47.81)    | -             | £28.68 (50.78)    |
| Cost of OTC medications        | -             | £19.59 (48.84)    | -             | £10.86 (33.16)    |
| Cost of daily living aids      | -             | £23.96 (176.40)   | -             | £10.79 (58.41)    |
| Cost of special foods          | -             | £3.09 (18.90)     | -             | £0.88 (4.61)      |
| Cost of clinic travel expenses | -             | £6.09 (22.92)     | -             | £1.60 (5.08)      |
| Cost of private health care    | -             | £35.83 (152.77)   | -             | £38.82 (299.08)   |

RLC = Rheumatologist-led clinic; NLC = Nurse-led clinic  
SD = Standard deviation
